# Supplementary material for: Hybrid total arterial minimally invasive off-pump coronary revascularization and percutaneous coronary intervention strategy for multivessel coronary artery disease: a cohort study with a median 11-year follow-up
Source: PubMed Central journal article supplement — Cardiovasc Diagn Ther. 2024 Apr 18;14(2):272–82. doi: 10.21037/cdt-23-413 (PMC11070998; doi:10.21037/cdt-23-413), 2024-04-18
Supplement: cdt-14-02-272-dss.pdf [file cdt-14-02-272-dss.pdf]

## Data Sharing Statement

|                     |                                                                                                                                                    |                                                                                             |
|---------------------|----------------------------------------------------------------------------------------------------------------------------------------------------|---------------------------------------------------------------------------------------------|
| <b>Article Info</b> | <a href="https://dx.doi.org/10.21037/cdt-23-413">https://dx.doi.org/10.21037/cdt-23-413</a>                                                        |                                                                                             |
| <b>Item</b>         | <b>Question</b>                                                                                                                                    | <b>Authors' Response<br/>(place "-" if not applicable)</b>                                  |
| 1                   | Would you like to share data collected for your study to others?                                                                                   | No.                                                                                         |
| 2                   | If not, would you like to share the reason for your decision?                                                                                      | Our ethics approval does not allow us to share any data, not within the range of this paper |
| 3                   | What data in particular will be shared?                                                                                                            | -                                                                                           |
| 4                   | Any other documents will be share? Such as study protocol, statistical analysis plan, informed consent form, clinical study report, analytic code. | -                                                                                           |
| 5                   | When will data availability begin?                                                                                                                 | -                                                                                           |
| 6                   | When will data availability end?                                                                                                                   | -                                                                                           |
| 7                   | To whom will you share the data?                                                                                                                   | -                                                                                           |
| 8                   | For what type of analysis or purpose?                                                                                                              | -                                                                                           |
| 9                   | How or where can the data/documents be obtained?                                                                                                   | -                                                                                           |
| 10                  | Any other restrictions?                                                                                                                            | -                                                                                           |
